# Supplementary material for: Nanoporous AuPt and AuPtAg alloy co-catalysts formed by dewetting–dealloying on an ordered TiO2 nanotube surface lead to significantly enhanced photocatalytic H2 generation
Source: Royal Society of Chemistry journal article supplement (doi:10.1039/c8ta04495c), 2018-01-01
Supplement: c8ta04495c1.pdf [file c8ta04495c1.pdf]

**Supporting information**

**Nanoporous AuPt and AuPtAg alloy co-catalysts formed by  
dewetting-dealloying on ordered TiO<sub>2</sub> nanotube surface lead to  
significantly enhanced photocatalytic H<sub>2</sub> generation**

Nhat Truong Nguyen,<sup>a</sup> Selda Ozkan,<sup>a</sup> Ondrej Tomanec,<sup>b</sup> Xuemei Zhou,<sup>a</sup> Radek Zboril,<sup>b</sup> Patrik Schmuki<sup>a,b,c\*</sup>

<sup>a</sup> Department of Materials Science and Engineering WW4-LKO, University of Erlangen-Nuremberg, Martensstrasse 7, D-91058 Erlangen, Germany.

<sup>b</sup> Regional Centre of Advanced Technologies and Materials, Department of Physical Chemistry, Faculty of Science, Palacky University, Slechtitelu 11, 783 71 Olomouc, Czech Republic.

<sup>c</sup> Chemistry Department, Faculty of Sciences, King Abdulaziz University, 80203 Jeddah, Saudi Arabia.

\*Corresponding author. Email: [schmuki@ww.uni-erlangen.de](mailto:schmuki@ww.uni-erlangen.de)

## Experimental section

➤ *Formation of TiO<sub>2</sub> tubes:* Titanium foils (Advent Research Materials, 0.125 mm thickness and 99.6+% purity) were cleaned by sonication in acetone, ethanol and deionized water for 10 minutes, followed by being dried under a N<sub>2</sub> gas stream. The spaced TiO<sub>2</sub> nanotubes were fabricated by anodizing cleaned titanium foils in triethylene glycol (TEG) electrolyte (consisting of 0.3 M NH<sub>4</sub>F and 3 M H<sub>2</sub>O) at 60 V for 1 h at 60 °C. The direct current potential was supported by a VLP 2403 pro, Voltcraft power supply. After anodization, the samples were immersed in ethanol for 2 h to remove organic remnants and then dried under a N<sub>2</sub> gas stream. These samples were annealed in air at 450 °C for 1 h (Rapid Thermal Annealer – Jipelec Jetfirst 100 – a heating and cooling rate of 30 °C min<sup>-1</sup>).

➤ *Noble metal decoration:* Plasma sputtering deposition (Leica EM SCD500) was used to deposit Au, Pt and Ag on TiO<sub>2</sub> samples. The amount of sputtered metals was controlled by monitoring their nominal thickness using an automated quartz crystal film. The sputtering angle is 30°.

➤ *Thermal dewetting:* To form alloyed nanoparticles, metal-decorated TiO<sub>2</sub> tubes were annealed in Ar at 400 °C, 450 °C, 500 °C and 550 °C for 1 h.

➤ *Dealloying:* Dealloying was carried out in HNO<sub>3</sub> 63% at room temperature for 4 h.

➤ *Characterization of the structure:* Field-emission scanning electron microscope (FE-SEM Hitachi S4800) was employed to characterize the morphology of the TiO<sub>2</sub> samples. The chemical composition of the samples was examined by X-ray photoelectron spectroscopy (XPS, PHI 5600 US). X-ray diffraction (XRD) performed with a X'pert Philips MPD (equipped with a Panalytical X'celerator detector) using graphite monochromized Cu K $\alpha$  radiation ( $\lambda=1.54056$  Å) was used to analyze the crystallographic properties of the samples. Transmission electron microscopy was carried out at a double-corrected FEI Titan<sup>3</sup> Themis equipped with a SuperX detector. UV-Vis diffuse reflectance spectra (DRS) were recorded on

a LAMBDA 950 UV-vis spectrophotometer (Perkin Elmer, Beaconsfield, UK) with an integrating sphere (BaSO<sub>4</sub> standard white board was used as reference)

➤ *Photocatalytic measurements:* The photocatalytic H<sub>2</sub> generation experiments were carried out by irradiating with UV light (UV-LED smart Opsytec, 365 nm, 100 mW cm<sup>-2</sup>) for 2 h. The samples were immersed in an aqueous solution of ethanol (20 vol%) in a quartz tube cell which is sealed with a rubber septum. Before photocatalytic experiments, the quartz cell was bubbled with N<sub>2</sub> gas to purge O<sub>2</sub>. 200 μL gas was extracted and analyzed by gas chromatography (GCMS-QO2010SE, Shimadzu) to examine the amount of photocatalytic H<sub>2</sub> production. The GC is equipped with a thermal conductivity detector (TCD), a Restek micropacked Shin Carbon ST column (2 m × 0.53 mm). GC measurements were conducted at a temperature of 45 °C (isothermal conditions) with the temperature of the injector setup at 280 °C and that of TCD at 260°C. The flow rate of the carrier gas (Argon) was 14.3 mL min<sup>-1</sup>.

➤ *Photoelectrochemical measurements:* IPCE spectra were recorded at a constant potential of 0.5 V (vs. Ag/AgCl) with a potentiostat (Jaisle IMP83 PC-T-BC) in Na<sub>2</sub>SO<sub>4</sub> aqueous solutions (0.1 M) under 200-800 nm light source (Oriol 6365 150 W Xe-lamp), while the wavelength was varied using a motor driven monochromator (Oriol Cornerstone 130 1/8 m). Incident photon to energy conversion (IPCE) values were calculated using  $IPCE \% = (1240 * i_{ph}) / (\lambda * I_{light})$ , where  $i_{ph}$  is the photocurrent density (mA cm<sup>-2</sup>),  $\lambda$  is the incident light wavelength (nm), and  $I_{light}$  is the intensity of the light source at each wavelength (mW cm<sup>-2</sup>).

**Table S1.** Atomic concentration (evaluated from EDS results) measured for samples decorated with Au (5 nm), Pt (5 nm) and Ag (30 nm) before and after dealloying in nitric acid.

|    | before dealloying<br>(at%) | after dealloying<br>(at%) | Loss of noble metals<br>before and after<br>dealloying (%) |
|----|----------------------------|---------------------------|------------------------------------------------------------|
| Ti | 64.90                      | 59.63                     |                                                            |
| O  | 32.55                      | 39.64                     |                                                            |
| Au | 0.44                       | 0.28                      | 36.4                                                       |
| Pt | 0.48                       | 0.31                      | 35.4                                                       |
| Ag | 1.64                       | 0.14                      | 91.5                                                       |

**Table S2.** Comparison of our porous AuPt/TiO<sub>2</sub> NTs photocatalyst with other promising TiO<sub>2</sub> photocatalysts

| Catalyst                                                            | Amount                           | H <sub>2</sub> generation<br>rate              | Light source                             | Scavenger              |
|---------------------------------------------------------------------|----------------------------------|------------------------------------------------|------------------------------------------|------------------------|
| 1 wt% PdAu/TiO <sub>2</sub><br>NPs <sup>1</sup>                     | 50 mg                            | 19.6 mol kg <sup>-1</sup> h <sup>-1</sup>      | 365 nm, 4×10 <sup>7</sup><br>photons/s   | 25 vol% glycerol       |
| 1 at% AuPt/TiO <sub>2</sub><br>NTs <sup>2</sup>                     | 7 μm-long                        | 21.26 mol kg <sup>-1</sup> h <sup>-1</sup>     | 325 nm, 60<br>mW/cm <sup>2</sup>         | 20 vol% ethanol        |
| WO <sub>3</sub> -Au-TiO <sub>2</sub> NTs <sup>3</sup>               | 200 nm-long                      | 14.88 mol kg <sup>-1</sup> h <sup>-1</sup>     | 325 nm, 40<br>mW/cm <sup>2</sup>         | 20 vol% ethanol        |
| Au-C <sub>3</sub> N <sub>4</sub> -TiO <sub>2</sub> NPs <sup>4</sup> | 250 mg                           | 0.35 mol kg <sup>-1</sup> h <sup>-1</sup>      | 150 W Hg lamp                            | 1 vol% methanol        |
| 0.15 at% Pt/TiO <sub>2</sub><br>NPs <sup>5</sup>                    | 7 μm-long                        | 18.71 mol kg <sup>-1</sup> h <sup>-1</sup>     | 325 nm, 60<br>mW/cm <sup>2</sup>         | 20 vol% ethanol        |
| <b>0.6 at% AuPt/TiO<sub>2</sub><br/>NTs (this work)</b>             | <b>3 μm-long<br/>(0.225 mg)*</b> | <b>27.38 mol kg<sup>-1</sup>h<sup>-1</sup></b> | <b>365 nm, 100<br/>mW/cm<sup>2</sup></b> | <b>20 vol% ethanol</b> |

\* The weight of TiO<sub>2</sub> nanotubular layers were calculated according to <sup>6</sup>.

- 1 R. Su, R. Tiruvalam, A. J. Logsdail, Q. He, C. A. Downing, M. T. Jensen, N. Dimitratos, L. Kesavan, P. P. Wells, R. Bechstein, H. H. Jensen, S. Wendt, C. R. A. Catlow, C. J. Kiely, G. J. Hutchings and F. Besenbacher, *ACS Nano*, 2014, **8**, 3490–3497.

- 2 H. Bian, N. T. Nguyen, J. Yoo, S. Hejazi, S. Mohajernia, J. Müller, E. Spiecker, H. Tsuchiya, O. Tomanec, B. E. Sanabria-Arenas, R. Zboril, Y. Y. Li and P. Schmuki, *ACS Appl. Mater. Interfaces*, 2018, acsami.8b03713.
- 3 M. Altomare, N. T. Nguyen, S. Hejazi and P. Schmuki, *Adv. Funct. Mater.*, 2018, **28**, 1704259..
- 4 C. Marchal, T. Cottineau, M. G. Méndez-Medrano, C. Colbeau-Justin, V. Caps and V. Keller, *Adv. Energy Mater.*, 2018, **8**, 1702142.
- 5 N. T. Nguyen, M. Altomare, J. Yoo, N. Taccardi, P. Schmuki, *Adv. Energy Mater.*, 2015, **6**, 1501926.
- 6 F. Mohammadpour, M. Altomare, S. So, K. Lee, M. Mokhtar, A. Alshehri, S. A. Al-Thabaiti and P. Schmuki, *Semicond. Sci. Technol.*, 2016, **31**, 14010.

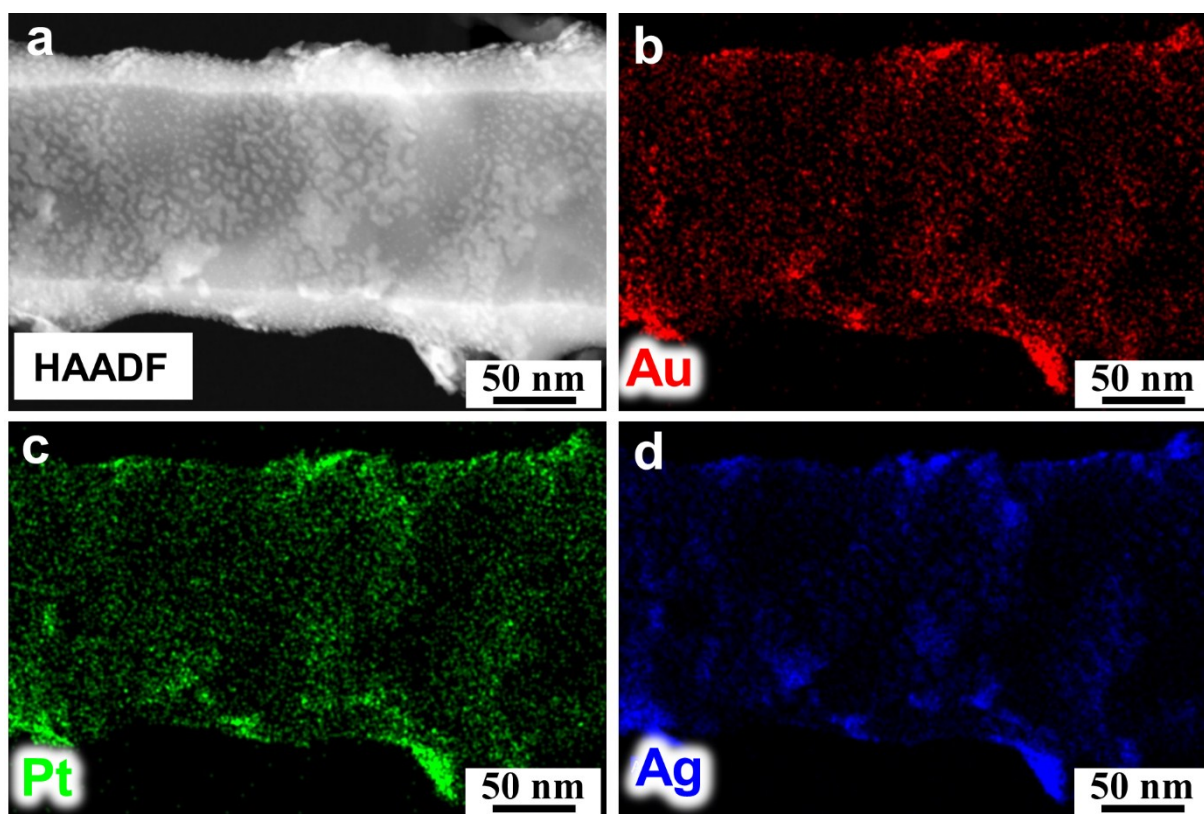

**Figure S1.** (a) HAADF image and (b-d) EDS mappings of TiO<sub>2</sub> nanotube after sputtering Au<sub>1</sub>Pt<sub>1</sub>Ag<sub>6</sub>.

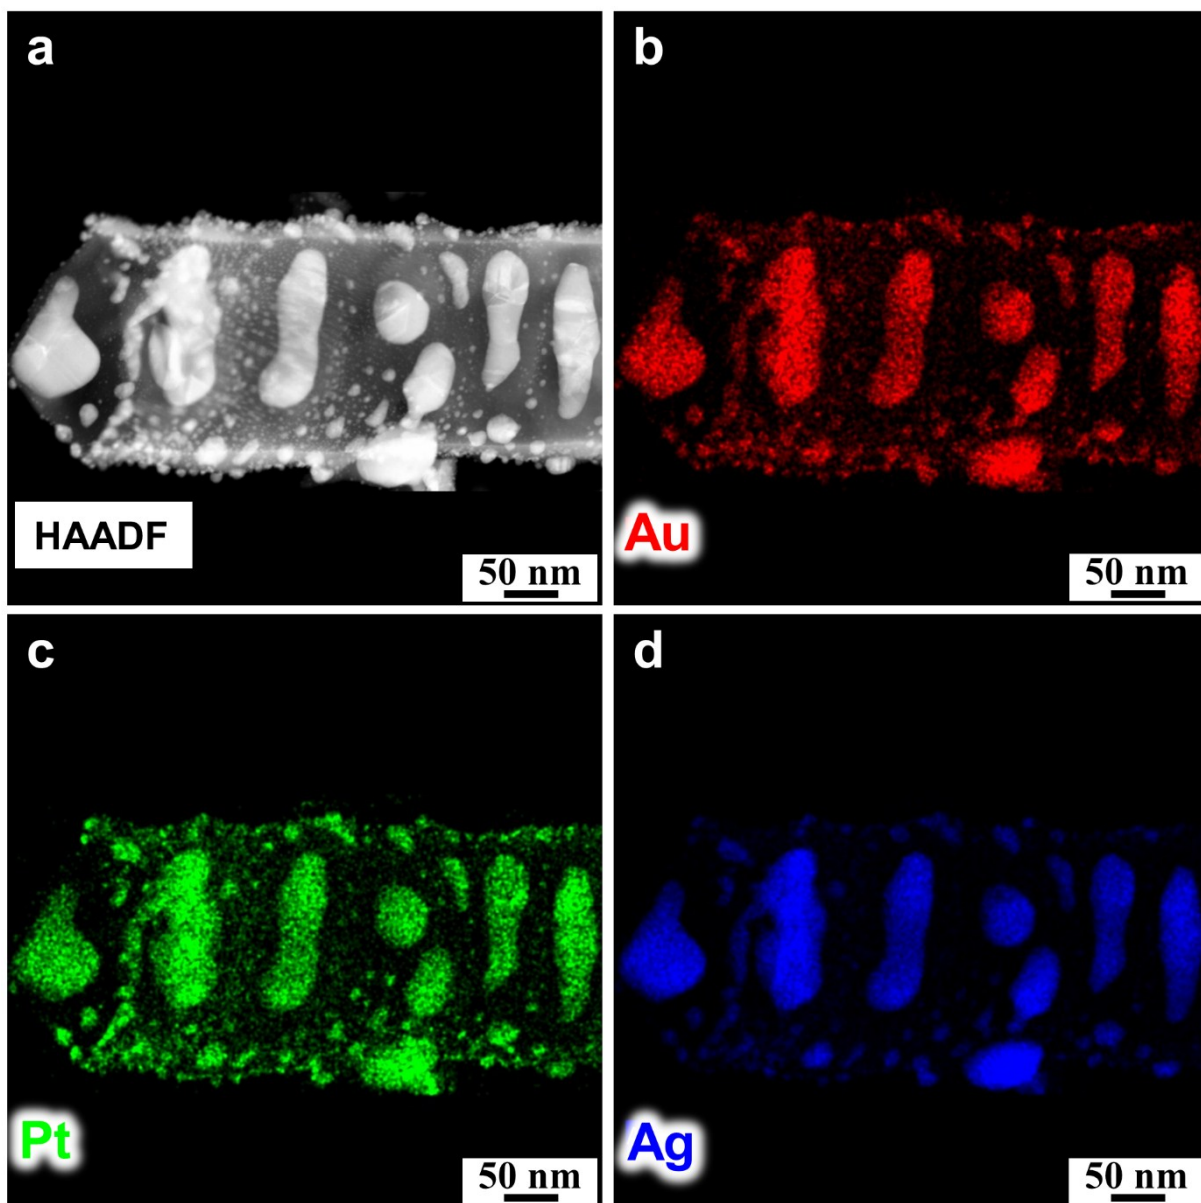

**Figure S2.** (a) HAADF image and (b-d) EDS mappings of TiO<sub>2</sub> nanotube after dewetting Au<sub>1</sub>Pt<sub>1</sub>Ag<sub>6</sub>. Homogeneous AuPtAg alloyed nanoparticles are formed on the tube wall.

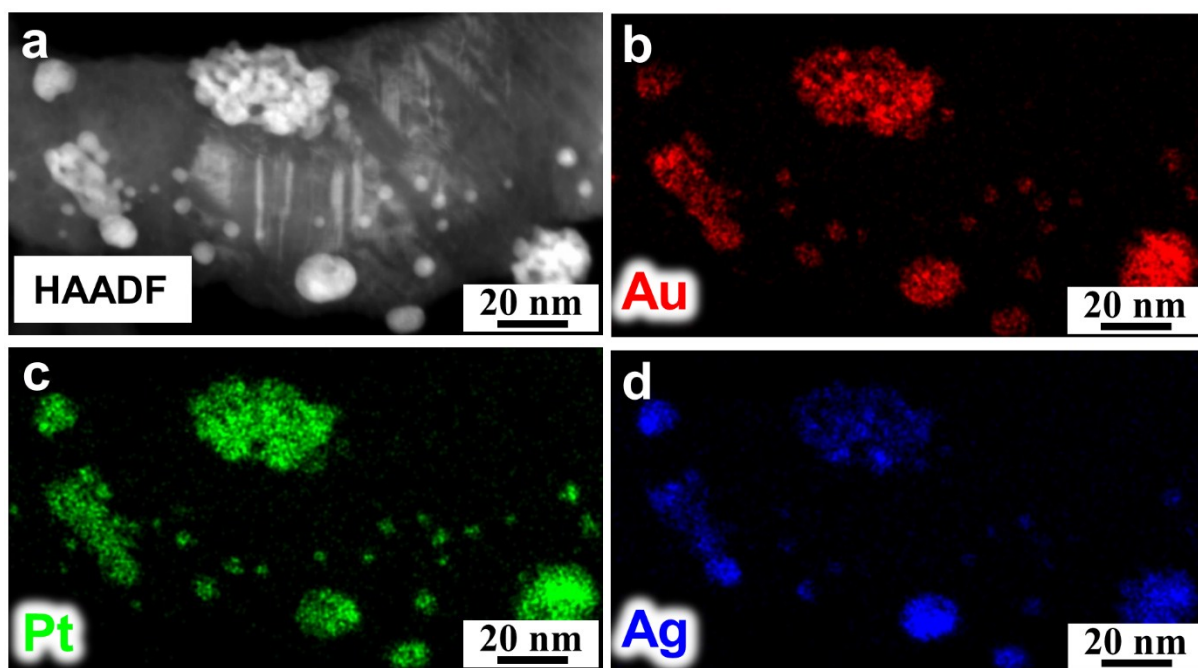

**Figure S3.** (a) HAADF image and (b-d) EDS mappings of TiO<sub>2</sub> nanotube after dealloying Au<sub>1</sub>Pt<sub>1</sub>Ag<sub>6</sub>. Porous alloyed nanoparticles are formed on the tube wall.

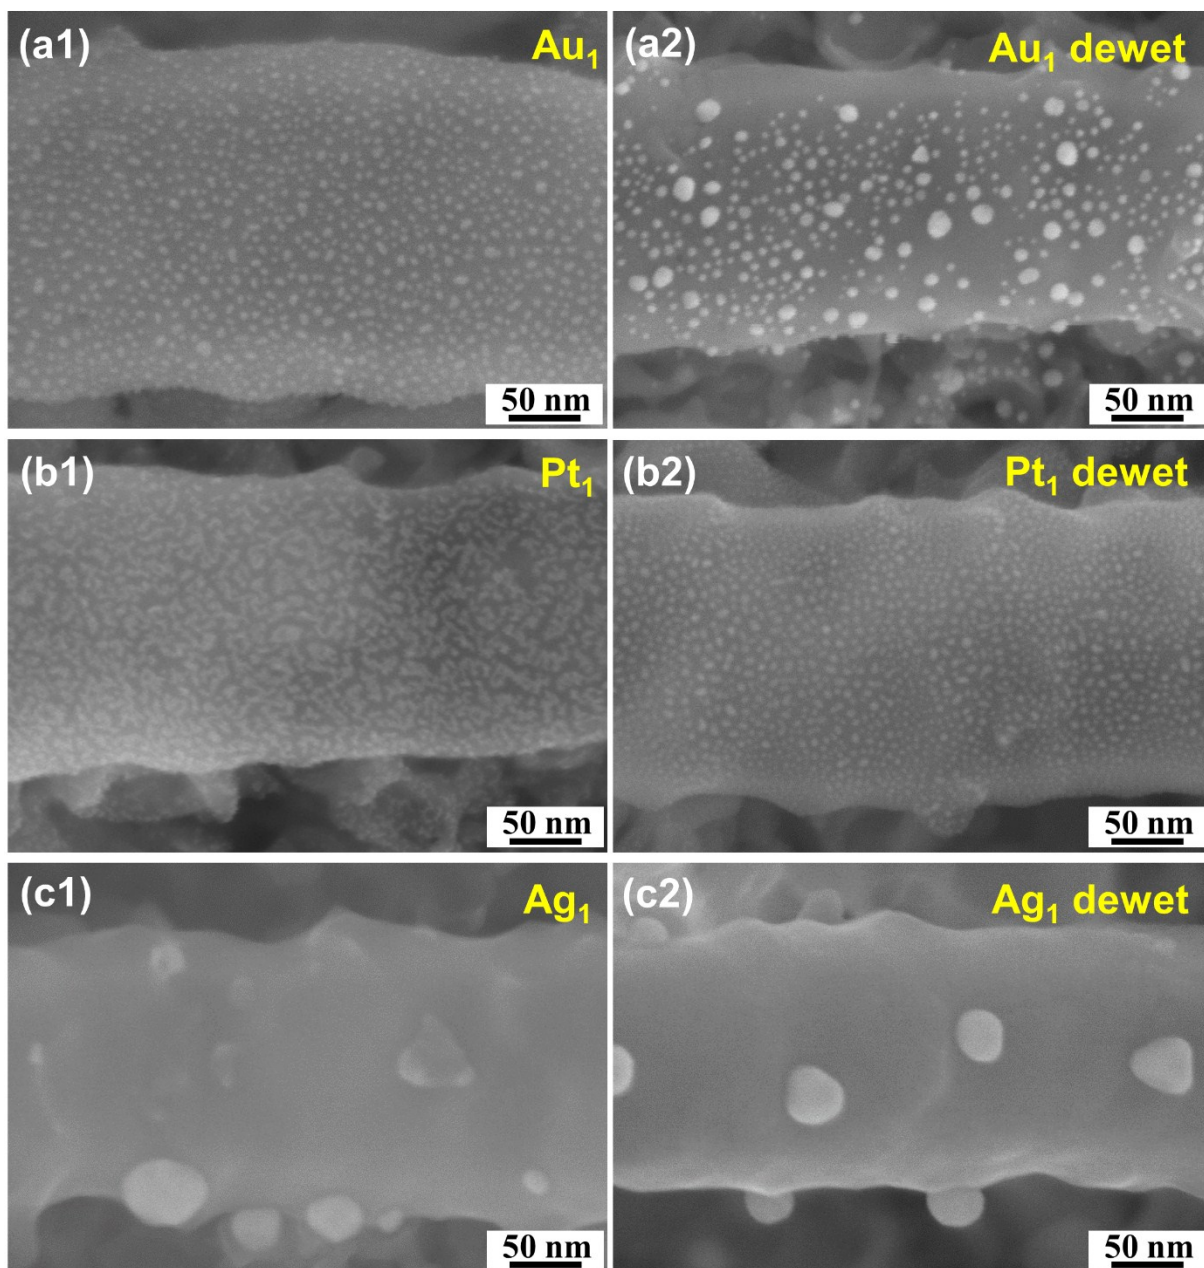

**Figure S4.** SEM images of TiO<sub>2</sub> nanotubes decorated with (a1,a2) 1 nm-thick Au; (b1,b2) 1 nm-thick Pt and (c1,c2) 1 nm-thick Ag. Samples (a2,b2,c2) were dewetted in Ar at 500 °C for 1 h.



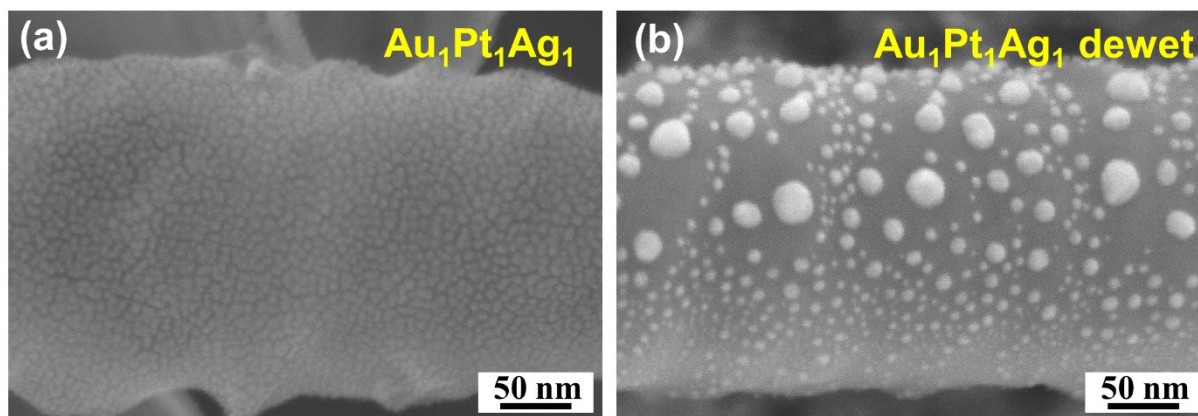

**Figure S5.** SEM images TiO<sub>2</sub> nanotubes decorated of 1 nm-thick Au, 1 nm-thick Pt and 1nm-thick Ag: (a) after sputtering and (b) after dewetting in Ar at 500 °C for 1 h.

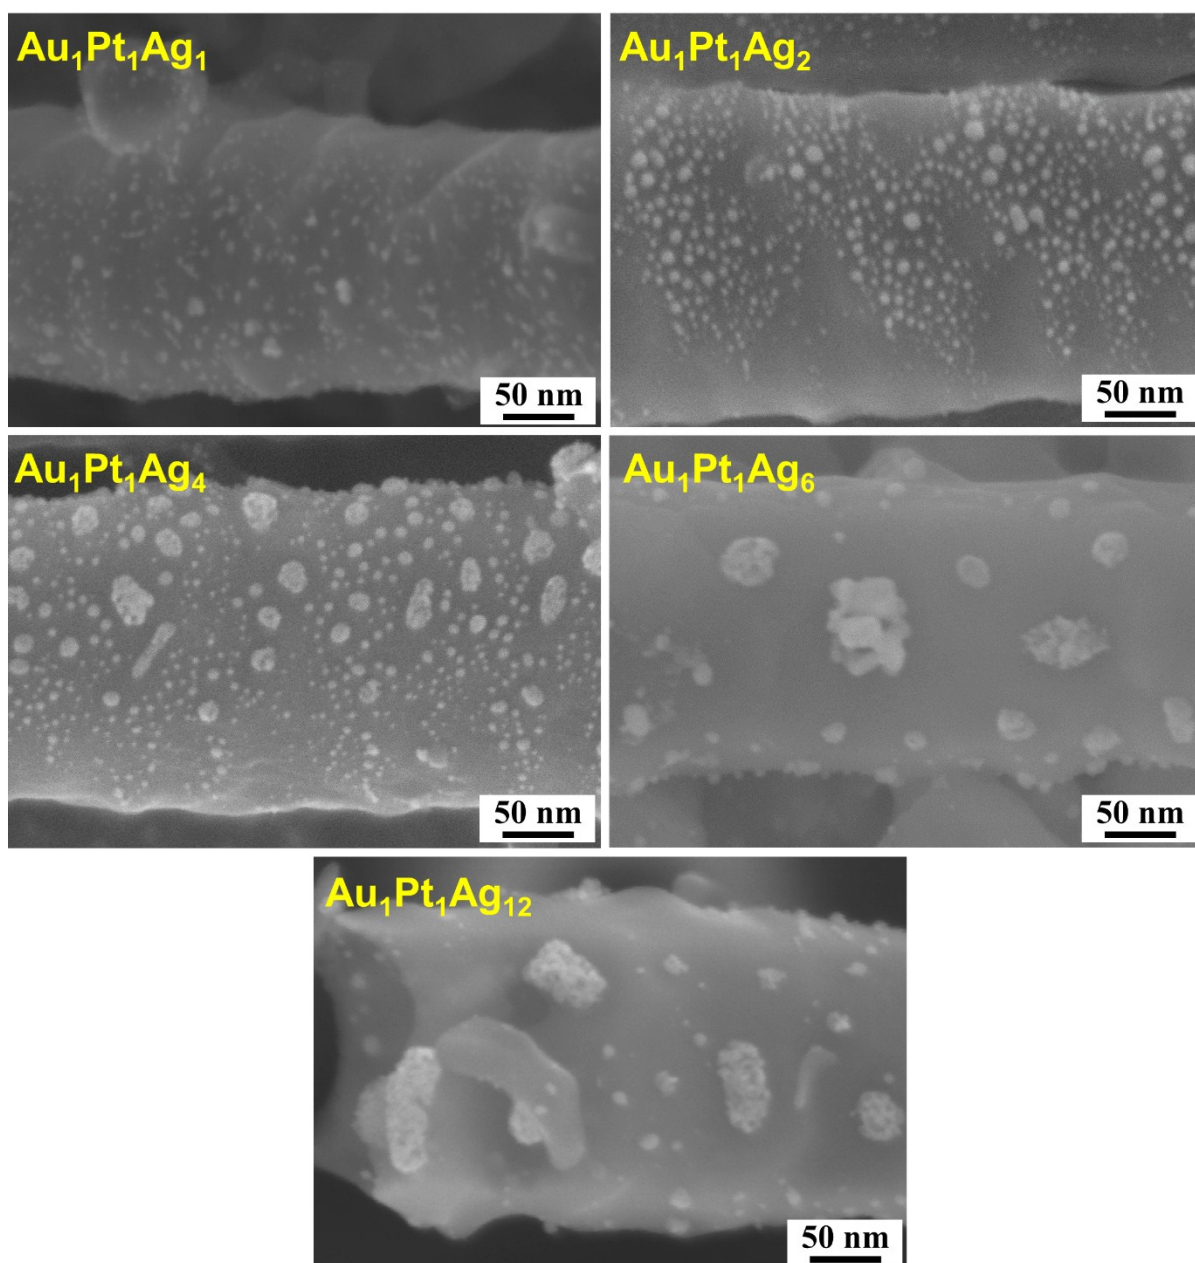

**Figure S6.** SEM images of porous AuPt alloy-nanoparticle-decorated  $\text{TiO}_2$  nanotubes. All samples were sputtered with 1 nm-thick Au, 1 nm-thick Pt and different amounts of Ag (1, 2, 4, 6 and 12 nm-thick). The samples then were dewetted in Ar at 500 °C for 1 h, followed by a dealloying step in  $\text{HNO}_3$  at 25 °C for 4 h.

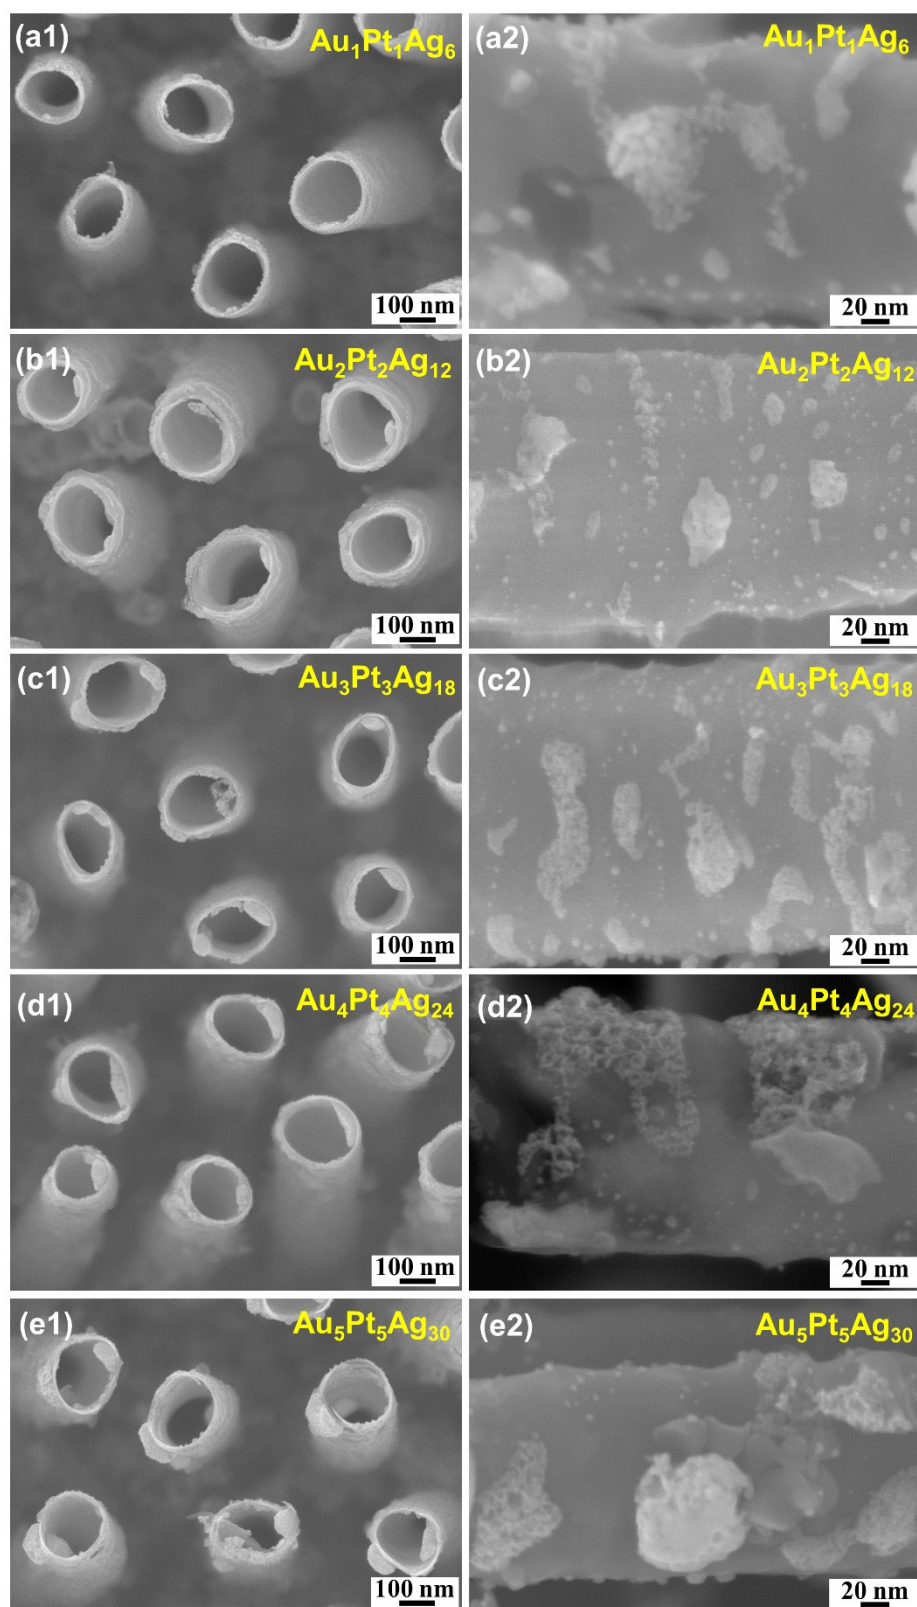

**Figure S7.** SEM images of porous AuPt alloy-nanoparticle-decorated  $\text{TiO}_2$  nanotubes: (a1,a2) 1 nm-thick Au, 1 nm-thick Pt and 6 nm-thick Ag; (b1,b2) 2 nm-thick Au, 2 nm-thick Pt and 12 nm-thick Ag; (c1,c2) 3 nm-thick Au, 3 nm-thick Pt and 18 nm-thick Ag; (d1,d2) 4 nm-thick Au, 4 nm-thick Pt and 24 nm-thick Ag; (e1,e2) 5 nm-thick Au, 5 nm-thick Pt and 30 nm-thick Ag. All samples were dewetted in Ar at 500 °C for 1 h, followed by a dealloying step in  $\text{HNO}_3$  at 25 °C for 4 h.

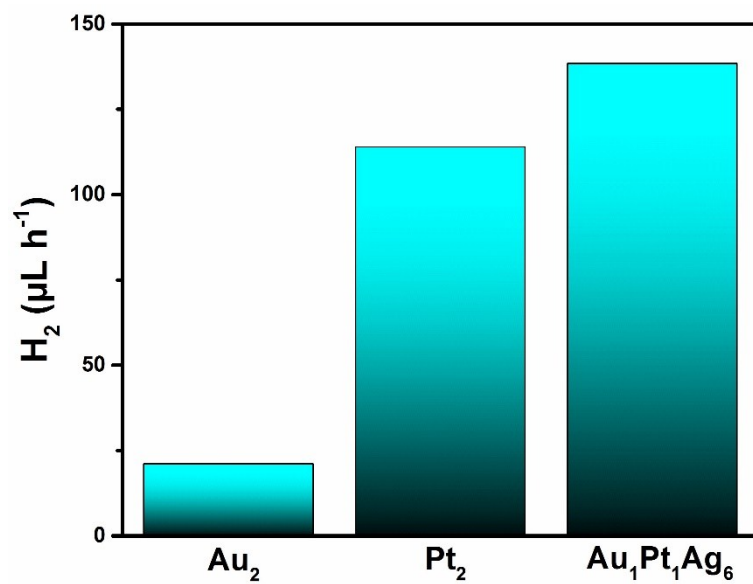

**Figure S8.** Photocatalytic H<sub>2</sub> generation of TiO<sub>2</sub> NTs decorated with 2 nm Au (Au<sub>2</sub>), 2 nm Pt (Pt<sub>2</sub>) and porous AuPt alloy particles (Au<sub>1</sub>Pt<sub>1</sub>Ag<sub>6</sub>). After sputtering, plain Au and Pt decorated TiO<sub>2</sub> tubes were annealed at 500 °C in Ar to induce dewetting.

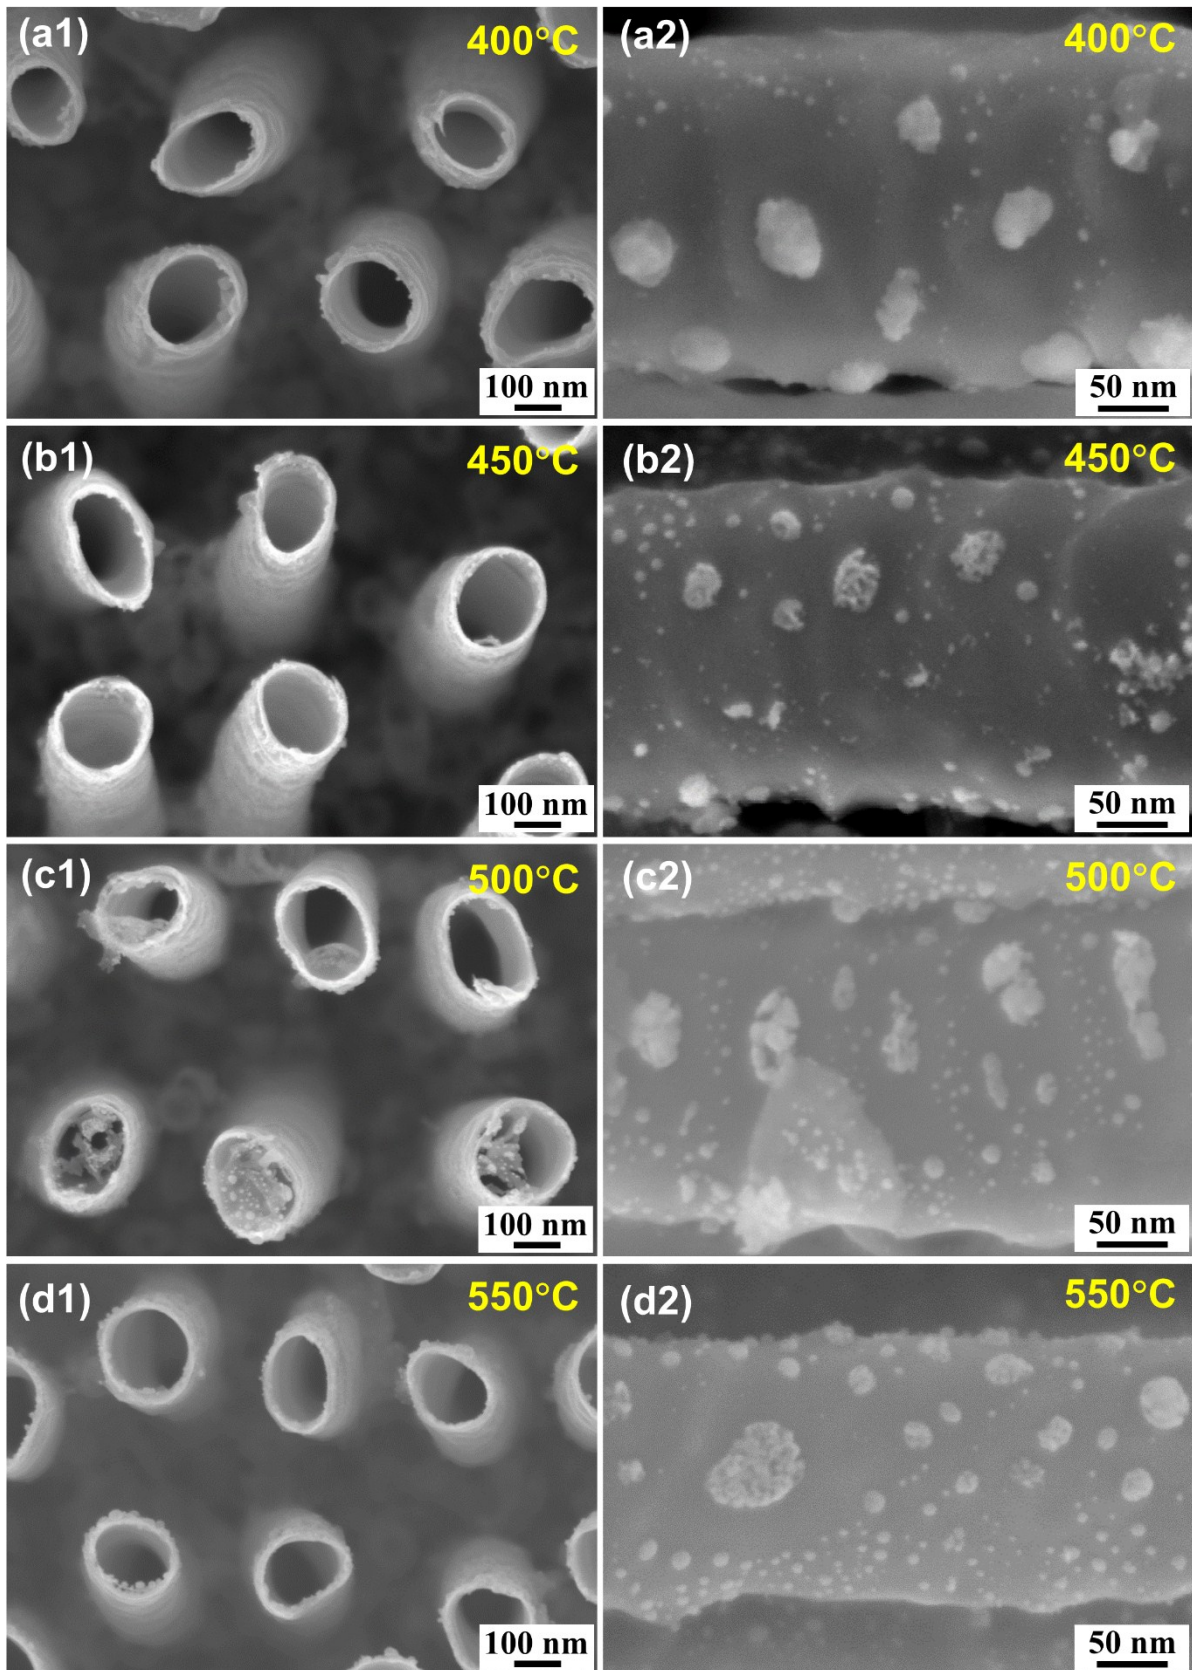

**Figure S9.** SEM images of TiO<sub>2</sub> nanotubes decorated with 1 nm-thick Au, 1 nm-thick Pt and 6 nm-thick Ag followed by a thermal dewetting in Ar for 1 h at different temperatures (a1,a2) 400 °C, (b1,b2) 450 °C, (c1,c2) 500 °C and (d1,d2) 550 °C. All samples were dealloyed in HNO<sub>3</sub> at 25 °C for 4 h.

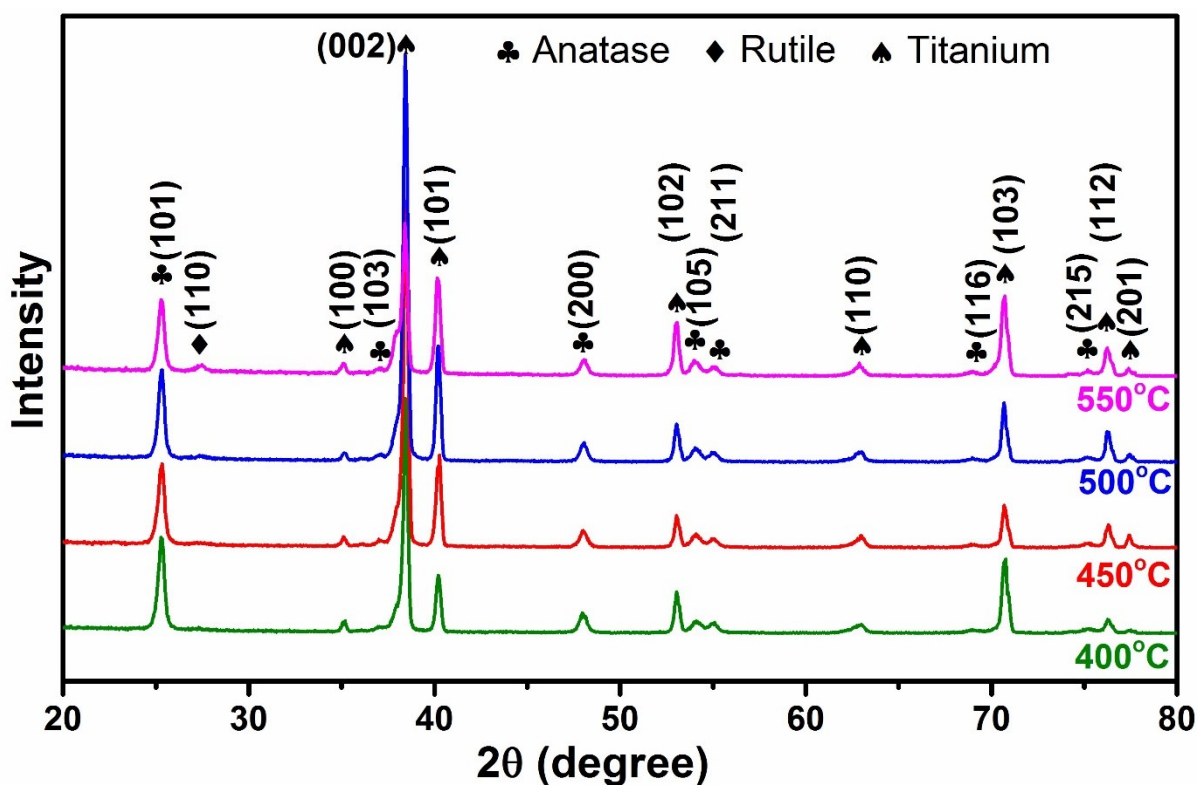

**Figure S10.** XRD patterns of TiO<sub>2</sub> nanotubes decorated with 1 nm-thick Au, 1 nm-thick Pt and 6 nm-thick Ag followed by a thermal dewetting process in Ar for 1 h at different temperatures: 400 °C, 450 °C, 500 °C and 550 °C. All samples were dealloyed in HNO<sub>3</sub> at 25 °C for 4 h.

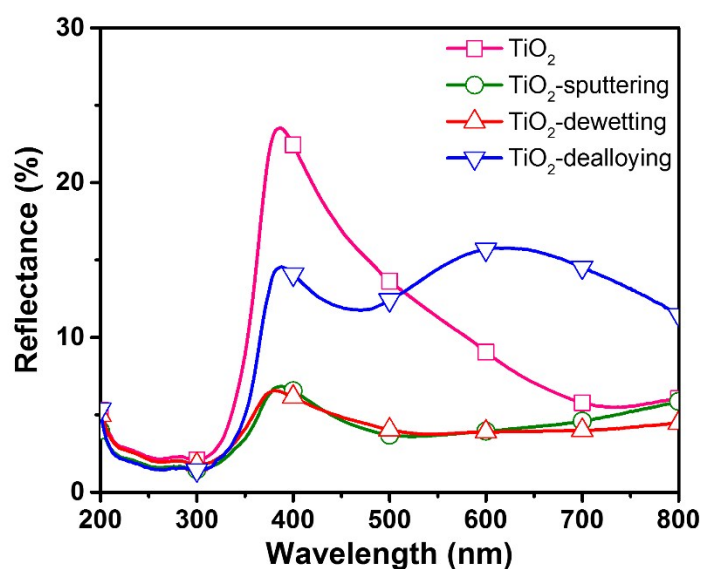

**Figure S11.** Reflectance measurements of TiO<sub>2</sub> NTs and Au<sub>1</sub>Pt<sub>1</sub>Ag<sub>6</sub>-decorated TiO<sub>2</sub> NTs.

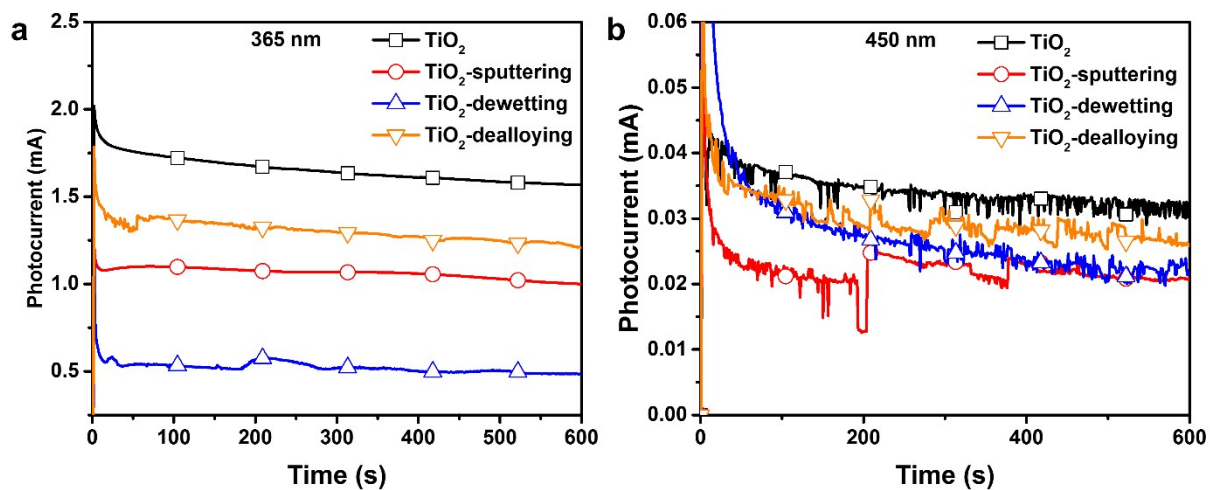

**Figure S12.** Photocurrent measurements of  $\text{TiO}_2$  nanotubes and  $\text{Au}_1\text{Pt}_1\text{Ag}_6$ -decorated  $\text{TiO}_2$  NTs using a light source of: (a) 365 nm and (b) 450 nm.
